# Supplementary material for: Molecular Structure, Thermodynamic and Spectral Characteristics of Metal-Free and Nickel Complex of Tetrakis(1,2,5-thiadiazolo)porphyrazine
Source: MDPI journal article supplement (doi:10.3390/molecules26102945), 2021-05-15
Supplement: s1 [file s1]

Supporting information for

**«Molecular Structure, thermodynamic and spectral characteristics of metal-free and nickel complex of tetrakis(1,2,5-thiadiazole)porphyrazine»**

Yuriy A. Zhabanov, Alexey V. Eroshin, Igor V. Ryzhov, Ilya A. Kuzmin, Daniil N. Finogenov  
and Pavel A. Stuzhin

*Ivanovo State University of Chemistry and Technology, Research Institute of Chemistry of  
Macroheterocyclic Compounds, Sheremetievskiy av. 7, 153000 Ivanovo, Russian Federation*

**Content**

|                                                                                             |   |
|---------------------------------------------------------------------------------------------|---|
| Figure S1. Structural formulas of porphyrazines and their derivatives .....                 | 2 |
| Cartesian coordinates of H <sub>2</sub> TTDPz optimized PBE0/pcseg-2 level of theory: ..... | 2 |
| Cartesian coordinates of singlet NiTTDPz optimized PBE0/pcseg-2 level of theory: .....      | 3 |
| Cartesian coordinates of triplet NiTTDPz optimized PBE0/pcseg-2 level of theory: .....      | 4 |

**Figure S1. Structural formulas of porphyrazines and their derivatives**

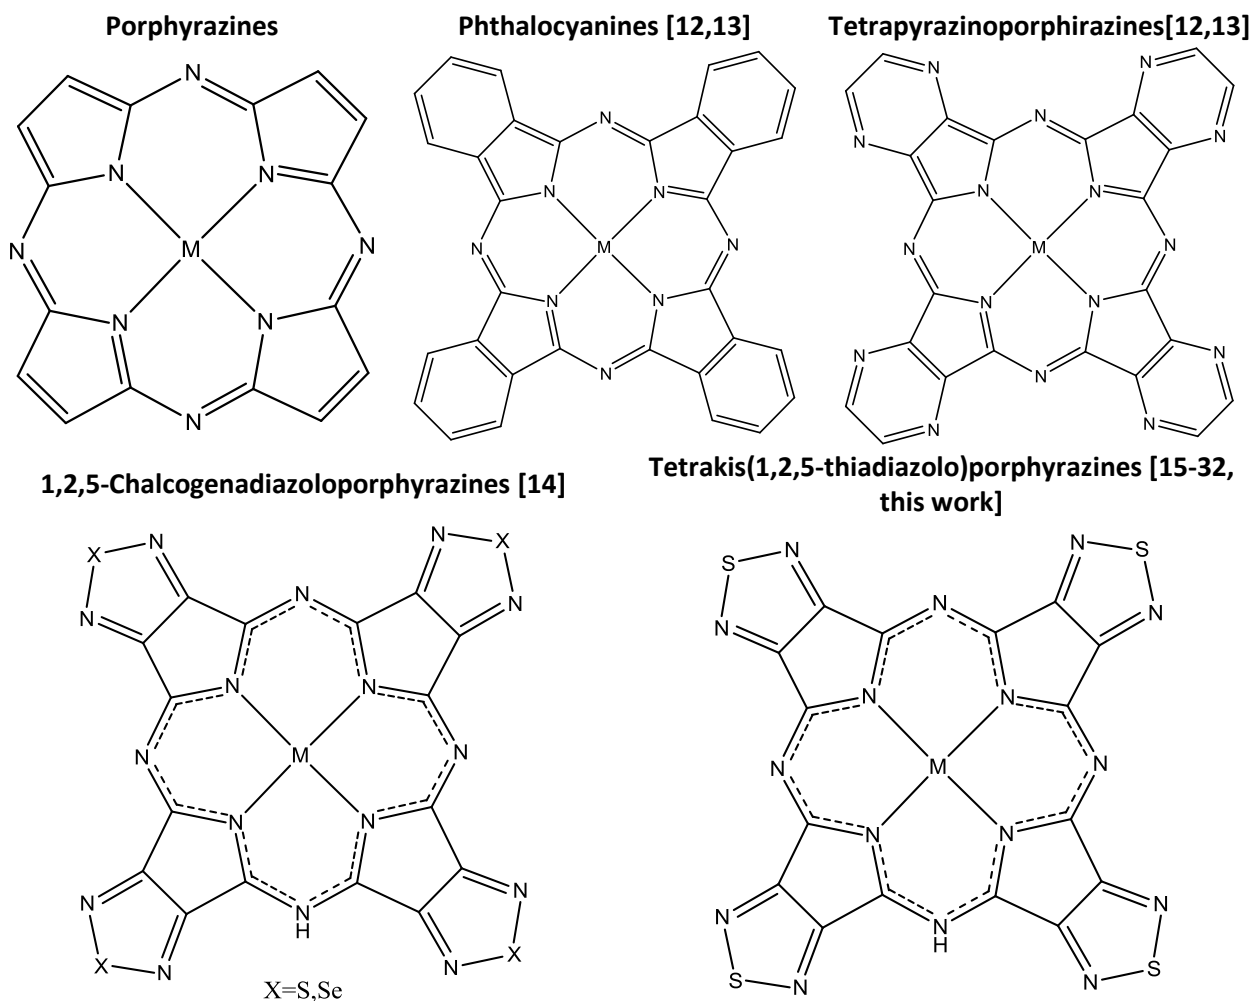

**Cartesian coordinates of H<sub>2</sub>TTDPz optimized PBE0/pcseg-2 level of theory:**

|   |                |                 |                 |
|---|----------------|-----------------|-----------------|
| N | 0.000000000000 | 1.978811454900  | 0.000000000000  |
| N | 0.000000000000 | -1.978811454900 | 0.000000000000  |
| N | 0.000000000000 | 0.000000000000  | -2.046203960200 |
| N | 0.000000000000 | 0.000000000000  | 2.046203960200  |
| N | 0.000000000000 | 2.391099841400  | 2.374326410800  |
| N | 0.000000000000 | -2.391099841400 | -2.374326410800 |
| N | 0.000000000000 | 2.391099841400  | -2.374326410800 |
| N | 0.000000000000 | -2.391099841400 | 2.374326410800  |
| C | 0.000000000000 | 2.765234052400  | -1.108498685100 |
| C | 0.000000000000 | -2.765234052400 | 1.108498685100  |
| C | 0.000000000000 | 2.765234052400  | 1.108498685100  |
| C | 0.000000000000 | -2.765234052400 | -1.108498685100 |
| C | 0.000000000000 | 1.157254383600  | 2.788162570600  |
| C | 0.000000000000 | -1.157254383600 | -2.788162570600 |
| C | 0.000000000000 | 1.157254383600  | -2.788162570600 |
| C | 0.000000000000 | -1.157254383600 | 2.788162570600  |
| C | 0.000000000000 | 4.167134266100  | -0.704184322900 |
| C | 0.000000000000 | -4.167134266100 | 0.704184322900  |
| C | 0.000000000000 | 4.167134266100  | 0.704184322900  |
| C | 0.000000000000 | -4.167134266100 | -0.704184322900 |

|   |                |                 |                 |
|---|----------------|-----------------|-----------------|
| C | 0.000000000000 | 0.708060907000  | 4.163310557100  |
| C | 0.000000000000 | -0.708060907000 | -4.163310557100 |
| C | 0.000000000000 | 0.708060907000  | -4.163310557100 |
| C | 0.000000000000 | -0.708060907000 | 4.163310557100  |
| H | 0.000000000000 | 0.000000000000  | 1.035206320600  |
| H | 0.000000000000 | 0.000000000000  | -1.035206320600 |
| N | 0.000000000000 | 1.253933505300  | -5.362124418600 |
| N | 0.000000000000 | -1.253933505300 | 5.362124418600  |
| N | 0.000000000000 | 1.253933505300  | 5.362124418600  |
| N | 0.000000000000 | -1.253933505300 | -5.362124418600 |
| N | 0.000000000000 | 5.358525045700  | 1.255864591700  |
| N | 0.000000000000 | -5.358525045700 | -1.255864591700 |
| N | 0.000000000000 | 5.358525045700  | -1.255864591700 |
| N | 0.000000000000 | -5.358525045700 | 1.255864591700  |
| S | 0.000000000000 | 0.000000000000  | 6.390694983900  |
| S | 0.000000000000 | 0.000000000000  | -6.390694983900 |
| S | 0.000000000000 | 6.398911216700  | 0.000000000000  |
| S | 0.000000000000 | -6.398911216700 | 0.000000000000  |

**Cartesian coordinates of singlet NiTTDPz optimized PBE0/pcseg-2 level of theory:**

|   |                 |                 |                |
|---|-----------------|-----------------|----------------|
| N | 0.000000000000  | -1.926902693800 | 0.000000000000 |
| N | 1.926902693800  | 0.000000000000  | 0.000000000000 |
| N | 0.000000000000  | 1.926902693800  | 0.000000000000 |
| N | -1.926902693800 | 0.000000000000  | 0.000000000000 |
| N | -2.369204795700 | -2.369204795700 | 0.000000000000 |
| N | 2.369204795700  | -2.369204795700 | 0.000000000000 |
| N | 2.369204795700  | 2.369204795700  | 0.000000000000 |
| N | -2.369204795700 | 2.369204795700  | 0.000000000000 |
| C | 1.116591026000  | -2.727954576300 | 0.000000000000 |
| C | 2.727954576300  | 1.116591026000  | 0.000000000000 |
| C | -1.116591026000 | 2.727954576300  | 0.000000000000 |
| C | -2.727954576300 | 1.116591026000  | 0.000000000000 |
| C | -1.116591026000 | -2.727954576300 | 0.000000000000 |
| C | 2.727954576300  | -1.116591026000 | 0.000000000000 |
| C | 1.116591026000  | 2.727954576300  | 0.000000000000 |
| C | -2.727954576300 | -1.116591026000 | 0.000000000000 |
| C | 0.700585082700  | -4.113020594100 | 0.000000000000 |
| C | 4.113020594100  | 0.700585082700  | 0.000000000000 |
| C | -0.700585082700 | 4.113020594100  | 0.000000000000 |
| C | -4.113020594100 | 0.700585082700  | 0.000000000000 |
| C | -0.700585082700 | -4.113020594100 | 0.000000000000 |
| C | 4.113020594100  | -0.700585082700 | 0.000000000000 |
| C | 0.700585082700  | 4.113020594100  | 0.000000000000 |
| C | -4.113020594100 | -0.700585082700 | 0.000000000000 |
| N | 1.255902817200  | -5.307216104300 | 0.000000000000 |
| N | 5.307216104300  | 1.255902817200  | 0.000000000000 |
| N | -1.255902817200 | 5.307216104300  | 0.000000000000 |
| N | -5.307216104300 | 1.255902817200  | 0.000000000000 |
| N | -1.255902817200 | -5.307216104300 | 0.000000000000 |
| N | 5.307216104300  | -1.255902817200 | 0.000000000000 |
| N | 1.255902817200  | 5.307216104300  | 0.000000000000 |
| N | -5.307216104300 | -1.255902817200 | 0.000000000000 |
| S | 0.000000000000  | -6.339895711100 | 0.000000000000 |
| S | 6.339895711100  | 0.000000000000  | 0.000000000000 |
| S | 0.000000000000  | 6.339895711100  | 0.000000000000 |

|    |                 |                |                |
|----|-----------------|----------------|----------------|
| S  | -6.339895711100 | 0.000000000000 | 0.000000000000 |
| Ni | 0.000000000000  | 0.000000000000 | 0.000000000000 |

**Cartesian coordinates of triplet NiTTDPz optimized PBE0/pcseg-2 level of theory:**

|    |                 |                 |                |
|----|-----------------|-----------------|----------------|
| N  | -1.975864229200 | 0.000000000000  | 0.000000000000 |
| N  | 0.000000000000  | -1.975864229200 | 0.000000000000 |
| N  | 1.975864229200  | 0.000000000000  | 0.000000000000 |
| N  | 0.000000000000  | 1.975864229200  | 0.000000000000 |
| N  | -2.375158493000 | 2.375158493000  | 0.000000000000 |
| N  | -2.375158493000 | -2.375158493000 | 0.000000000000 |
| N  | 2.375158493000  | -2.375158493000 | 0.000000000000 |
| N  | 2.375158493000  | 2.375158493000  | 0.000000000000 |
| C  | -2.756436416700 | 1.118901536000  | 0.000000000000 |
| C  | -1.118901536000 | -2.756436416700 | 0.000000000000 |
| C  | 2.756436416700  | -1.118901536000 | 0.000000000000 |
| C  | 1.118901536000  | -2.756436416700 | 0.000000000000 |
| C  | 2.756436416700  | 1.118901536000  | 0.000000000000 |
| C  | -1.118901536000 | 2.756436416700  | 0.000000000000 |
| C  | -2.756436416700 | -1.118901536000 | 0.000000000000 |
| C  | 1.118901536000  | 2.756436416700  | 0.000000000000 |
| C  | -4.159830369900 | 0.703633342600  | 0.000000000000 |
| C  | -0.703633342600 | -4.159830369900 | 0.000000000000 |
| C  | 4.159830369900  | -0.703633342600 | 0.000000000000 |
| C  | 0.703633342600  | -4.159830369900 | 0.000000000000 |
| C  | 4.159830369900  | 0.703633342600  | 0.000000000000 |
| C  | -0.703633342600 | 4.159830369900  | 0.000000000000 |
| C  | -4.159830369900 | -0.703633342600 | 0.000000000000 |
| C  | 0.703633342600  | 4.159830369900  | 0.000000000000 |
| N  | -5.347384719300 | 1.255773280000  | 0.000000000000 |
| N  | -1.255773280000 | -5.347384719300 | 0.000000000000 |
| N  | 5.347384719300  | -1.255773280000 | 0.000000000000 |
| N  | 1.255773280000  | -5.347384719300 | 0.000000000000 |
| N  | 5.347384719300  | 1.255773280000  | 0.000000000000 |
| N  | -1.255773280000 | 5.347384719300  | 0.000000000000 |
| N  | -5.347384719300 | -1.255773280000 | 0.000000000000 |
| N  | 1.255773280000  | 5.347384719300  | 0.000000000000 |
| S  | -6.393555437300 | 0.000000000000  | 0.000000000000 |
| S  | 0.000000000000  | -6.393555437300 | 0.000000000000 |
| S  | 6.393555437300  | 0.000000000000  | 0.000000000000 |
| S  | 0.000000000000  | 6.393555437300  | 0.000000000000 |
| Ni | 0.000000000000  | 0.000000000000  | 0.000000000000 |
